# Supplementary material for: The TIR Homologue Lies near Resistance Genes in Staphylococcus aureus, Coupling Modulation of Virulence and Antimicrobial Susceptibility
Source: PubMed Central journal article supplement (PMC5218399; doi:10.1371/journal.ppat.1006092), 2017-01-06
Supplement: ppat.1006092.s001.pdf [file ppat.1006092.s001.pdf]

**S1 Table. Primers and restriction enzymes used for construction of the *tirS*-deleted strain.**

| Primer           | 5'–3' sequence                    | Restriction enzyme |
|------------------|-----------------------------------|--------------------|
| tirS_6345-6364_F | ATAGGGATCCACTAAAATTCCGAAACCACA    | BamHI              |
| tirS_7246-7275_R | TCTACCGCGGATAATACCTCGCTTTTATA     | SacII              |
| tirS_8119-8151_F | ACGACCTAGGTAATAGTATTGGTTATCTACTTT | AvrII              |
| tirS_9119-9148_R | AAATGGAATTCAACAGTTACTCCCGCTTCT    | EcoRI              |
| vG_CDS_1_R       | AATCTCTTCATTTCTTTTGTATTTTTATCT    |                    |
| vG_CDS_2_F       | GATTATGGAAAAATTATTAATACTAAT       |                    |
| vG_cat_1_R       | GAAAGCAGACAAGTAAGCCTCCTAAA        |                    |
| vG_cat_2_F       | GAAAGAGAAAAAGCATTTTCAGGTA         |                    |
| vG_H1_F          | AACTTATAGTGATTGGGATATGCTA         |                    |
| vG_H2_F          | AGAATTAAATTCAATTAATGAATA          |                    |
| vG_H3_F          | GGAATTAAATGAAAAAAGCAGTGT          |                    |
| vG_H4_F          | ACTAATCTATTGAACGAACCCCATTA        |                    |
| vG_H5_R          | ACTATTTCATACTCATCAATCGAT          |                    |
| vG_H6_R          | TAATCCCTCTTTGCTTTTAAAGTAG         |                    |
| vG_H7_R          | TAATACCTCGCTTTTATAATCTT           |                    |
| vG_H8_R          | CTATAAGTTTCTTTTAAAAATATC          |                    |
| IngDNA_F:        | TACCTTGATCAATAAACTCATTTAATAAGTCTT |                    |
| IngDNA_R:        | ATCTTCCATACTATCTTAGCAGATGATTTTAT  |                    |
