# Supplementary material for: The TIR Homologue Lies near Resistance Genes in Staphylococcus aureus, Coupling Modulation of Virulence and Antimicrobial Susceptibility
Source: PubMed Central journal article supplement (PMC5218399; doi:10.1371/journal.ppat.1006092), 2017-01-06
Supplement: ppat.1006092.s002.pdf [file ppat.1006092.s002.pdf]

---

| Primer                | 5'–3' sequence                       | Restriction |
|-----------------------|--------------------------------------|-------------|
| phi259                | TTACCCGGGTAATAGTGGACAACGTCG          | SmaI        |
| phi748                | CATGATATCATTTCCTTTCTTTATAAATTTTATTAC | EcoRV       |
| phi2648               | AAATCCTGGATCCTAAACAGATAGATAATCAAAAAA | BamHI       |
| phi2819               | TTCCCGGGTTCACAAGTGTTTGCC             | SmaI        |
| tir391                | AGGAGGCCTATGTCAGTATTAGAAAC           | StuI        |
| tir1250               | TACGGATCCTAATTCTTAGAATTAAC           | BamHI       |
| New29-523             | GAGAATTCAGTGGCTACATTCGAACATATC       | EcoRI       |
| New30-2371            | GCGTCGACTTAAATATGGGATGTCC            | Sall        |
| <i>tirS</i> -F RT-PCR | AGTGGTTGGAGTAGGTACGA                 |             |
| <i>tirS</i> -R RT-PCR | GCACGTACATCTTCAACTCA                 |             |

---
